# Supplementary material
Source: publisher site journal article supplement (https://www.dovepress.com/get_supplementary_file.php?f=342627.docx)
Supplement: Supplementary file 1 [file get_supplementary_file.php]

**Supplemental digital file 1.** The non-pharmacological pain management strategies questionnaire

**Supplemental digital file 2.** Adaptation of the Opioid-Related Symptom Distress Scale

**Supplemental digital file 3.** Semi-structured interview questions and themes (complete version)

| **CONCEPT**  **Framing questions** | **Theme**  **Sub-theme** | **Sample Quotes** |
| --- | --- | --- |
| 1. **PAIN MANAGEMENT**   *«How do you prefer to manage your pain? «*  *«What strategies do you think would improve your pain management? «* | **Preferred method**   - None - Combination of strategies - Non-pharmacological strategies - Physical interventions (physiotherapy, improving physical shape, home exercises, hot water, ice, massage, osteopathy,   physiotherapy)   - Cognitive interventions (distraction, psychology: acceptance/reflection) - Pharmacological strategies - Cannabis - Non-opioid medication (cream, Tylenol/Advil, natural method))   **Optimal strategies**   - Have no idea - Non-pharmacological strategies - Physical interventions (rehabilitation exercises, physiotherapy or more physiotherapy, good posture, massage therapy) - Cognitive interventions (psychological, breathing/meditation) - Pharmacological strategies - Cannabis - Other medication | “I don't know...I'm just waiting.” P23  “I mean that at some point the pain will start to heal there, a little more, the pain will decrease. That's how I see it.” P70  “¶I  So, it would be to combine several strategies like you currently do opioids and massage? ¶P  Yes.” P46  “¶I  So, if we recap, how do you prefer to manage your pain? It would be with opioids and physiotherapy at the same time, or one or the other, or both at the same time? ¶ P Yes, both at the same time.” P48  “¶P You think the best thing for you, anyway, is… would be CBD, right? ¶P Yes. With the cream ... the massages.” P43  “¶I  Okay it's a little mix of that, in fact it would be CBD and non-pharmacological strategies with physiotherapy, massages, animals… ? ¶P  Yes. Yes. And now I have a wonderful cream based on lavender-scented hemp oil and it has an impact on me, it calms me down and it relaxes me. This is it” P61  “¶I  How do you prefer to manage your pain?» How would it be with opioids and physiotherapy at the same time, or one or the other, or both at the same time? ¶P  Yes, both at the same time.” P48  “My preference would still be to stay on medication and do massages at the same time... things like that ...” P67  “With ice and cannabis.” P22  “Uh… non-pharmacological” P43  “Definitely yes, with non-pharmacological strategies” P42  “For me, the least pharmacology as possible would be ideal.” P51  “I tried a lot of things, specifically non-pharmacological drugs to manage pain, you know, breathing, baths, exercises... and necessarily I take Melatonin, Valerian, to sleep, you know, it's really more natural stuff in a way because I don't want to get stuck with chemicals in the body… but, at some point, I have no choice because there, I do not have a choice.” P53    “I'm going to tell you that if, as long as I'm going to be able to go over there to the physiotherapist […]” P48  “Uh… ideally, you know, to exercise and be in good physical shape.” P34  “Sometimes I have some stretching […]” P43  “I went to the physio's for their pain therapy; an osteopath to minimize pain; then, I did a lot of exercises, by myself at home, like training to rebuild my muscles and to try to work again a little uh… It's a bit of these three things.” P14  “When it hurts too much, I put heat on my wrist. Well, I started physio, and yeah that hurts too. But uh, I ... I mean that I move my wrist in hot water and that makes me feel good too. These are things that I do.” P70  “With uh ... well with ice and cannabis.” «P22  “¶I  Okay then CBD with such non-pharmacological strategies, for example, like pets in the house, and massages? ¶P  Yes.” P61  “Uh… massages.” P31  “Yeah massages can help, but massages are not the 'best'. Like I told you strategies are more like thinking, and I will choose to change my thinking.” P55  “Uh… in an ideal world, that would be to have a wife giving me massages, twice a day (he laughs), but I can forget about that.” P63  “Yes. With the cream ... the massages.”  “But, you know, a massage is also effective uh… I can't say that… it’s clear that massages are my favorite, that’s for sure.” P46  “Of course, the massages really helped a lot. Let's say that I would have liked that… between the opioids and the massages… I will say that it is the massages which helped the most.” P08  “Of course, physio is important to continue.” P50  “[…] when the physiotherapist does a massage, it feels good… when I got out of there it had reduced… but it came back afterwards. But maybe if I keep getting them… it might do some good.” P48  “Physiotherapy and cannabis, I would find that good.” P30  “As I told you the strategies are more like changing my thoughts, and I will choose to change my thoughts.” P55  “I'm going to think about other things, you know, I'm going to focus on other things. I'm going to grab a book uh… most of the time, that's it if I can't move. If I can move, I'll take care of it. If I'm lying on a bed there, it's a different story.” P62  “You see when I have something like that, well, I'm going to rest, sit, and relax. It looks like I'm thinking of other things, you know, I do other things, it hurts a little bit, but, I forget it. I try to forget about it and do something else and not just think about my pain.” P56  “But in my opinion, it's going to be strange to say… but, it's my force of nature a bit. “¶I  Ok it's mostly through psychology. ¶P  Uh… to heal yourself by the force of nature. It is to accept my accident. It was not a stupid accident, it was I who created the accident.” P35  “Otherwise uh… well, that's it, maybe some cannabis if needed.” P34  “Cannabis.” P24  “I make a lot of infusions of Labrador tea and CBD oil, it's very effective. [...]. And now I have a wonderful cream based on lavender-scented hemp oil.” P61  “Well, listen, yes for sure if I have the chance to do it and the pain is not too intense uh ... well I have creams, but they are medicated creams, you know , mint-based or something like that uh… creams like that I apply more regularly a bit there.” P44  “With the cream ... the massages.” P43  “I would still say with sedatives because the pain was intense and the massages would not be effective enough in my opinion.” P41  “If I really had pain, I would take Tylenol.” P50  “I would rather take 2 Advil when I have pain.” P63  “I think if I ever had any pain it would be more like going back to Tylenol and things like that and not going on big medication.” P58  “There, maybe I'll try Tylenol as the nurse told me… we talked about it that week, I'll try Tylenol again if it comes back.” P65  “I always start with Tylenol all the time… a pain reliever, ok, and 95 percent of the time it’s enough.” P64  “If it doesn't work, well, like yesterday, I was having trouble with my pain and I took a Tylenol.” P56  “As I said earlier, it's Tylenol, Advil… that's pretty much what I take the most for pain.” P44  “¶P  Yeah I'd like that like now I'm taking Tylenol like… now I'm not taking any more. But, if there had been a substitute for that, that would have worked uh… but I didn't know any. ¶I  Okay. For you it would be pain medication but another what? ¶ P Yeah like a natural product if it existed.” P49  “That's it because I don't really know what strategies I should use and I wish there was a more natural one, that's what I would have liked to discover … observe that side” P49  “I don't know … that's a good question. But I have no idea” P24  “Uh… I don't know what to answer you on that…” P46  “In my case, I didn't have a terrible pain… everything was perfect.” P50  “It's to be diligent in doing my exercises for my rehabilitation. And, also, the strategy is to go according to my capacities, you know, not to surpass my capacities but to make a constant progression in this. Then strategically, it's to set myself realistic short or medium-term objectives for activities or things to do” P58  “I went once for physio and just the fact of being manipulated, to get me to work out and to test my flexibility, right away, I feel a benefit. We can try to do it ourselves, or our partner who is not a specialist ... but being touched by expert hands makes all the difference. I asked him if he offered massage therapy and he said no, except for severe burns which are massaged for their scars. But for cases like me, there isn't.” P51  “I'm going to start doing physiotherapy and I imagine that it will strengthen my muscles.” P56  “It's about not having bad posture. To be really comfortably positioned all the time. Er… no sudden movements and not forcing too much.” P14  “It's to accept and not to feel sorry for yourself. So accept, understand and persevere. To forge ahead in life. Do not hide behind drink, drugs and opioids.” P35  “I believe in breathing and meditation and all of that. I think it could have been a good alternative, in hospital, in any case, to know how to manage your emotions, that they teach you to breathe too.” P53  “For a person like me, it's cannabis, since I don't like taking pills.” P22  “Yes… uh other medicines but...I don't know” P31 |
| 1. **FOLLOW-UP AND SUPPORT**   *«What are your expectations in terms of follow-up and support to manage :*   1. *pain?* 2. *side effects? «* | **Needs & Expectations**  Non-pharmacological strategies  Physical interventions (chiropractic, physiotherapy, massage) and/or psychological interventions  Offered intervention  Personalized follow-up  Help for proper choice and use of medication  Choice of analgesic treatment  To be listened  Effective resource person  Feeling of abandonment without resources following discharge  More information  More recommendations and more precise information at discharge  Dependency monitoring  More attention given to addiction  None (No expectations, no need for support, adequate support and care) | “I would say maybe chiropractic sessions to try and reposition the back as I have no insurance...” P08  “I would like to start doing physio... They didn't tell me about physio...” P43  “Maybe massages too, um... yeah, prescribed, let's say.” P08  “The centre provides me with the services of physio professionals, of course, but also of a social worker, for the psychological side, to see how my morale and my condition are going. This is a service that I appreciated a lot because we also need support in those moments at a psychological level, of course, you know, to help us get through because it's still an ordeal in some way, you know.” P58  “In general, I would like to see other services than pharmacy offered to us. Massage therapy is the first service that comes to mind that does us good, but it's still expensive when you pay for it out of your own pocket [...] I would say that if I had had care in this area, once a week, before or after physio, it would have helped in an extraordinary way.” P51  “¶P  I think they should support people in pain management. [...] So each person deals with their pain differently. [...] You know like, with every person it's different. [...] I just find it easy to give drugs, you know, and I find that you don't really think about 'what is real pain? ¶I Okay. ¶P  But, at the same time, I know it's hard for everyone to put their finger on it. It's not easy to uh… my pain, you know, it can be 5 and for someone else the other way around. ¶I  I understand. Ok. ¶P  So that is very difficult because each person has a different tolerance level.” P53  "I think a bit more personal follow-up would make a big difference to a lot of people. " P44  “Whether it was okay if I take less and will I have more if I ever run out?” P34  “I wish what I want was more considered, let's say, and the normal doses that we recommend to people, it doesn't do anything to me.” P42  “There was no other alternative. That was it. I had no other choice. I would have liked, let's say, to have been offered and talked to and told that maybe we can try it” P49  “I think I am listened to well enough” P61  “¶P Um...er...if we had a bit more er...if we were a bit more listened to, let's say.¶ I Yes?¶ P Because right now, I have the impression that there's a certain er...there's a certain rigour in the way of doing things: 'this is how it works', and 'this is how we're going to do it', and 'this is what we're going to give you', and 'this is what you're going to get. ¶I Okay.¶ P Okay, but that's not what it does to me.¶I Yes, so instead we should listen to the person to find out what the person wants?¶P Yeah well, if there's a problem...but why? I don't want to be told that “yeah, but I gave you this and it's supposed to do that”. (He laughs) But I don't care because that's not what it does to me.” P42  «¶P Yeah, but, that's it, that's it, I don't feel like...I feel like...probably by being lied to...or something like that...doctors aren't so inclined to dig, or to want to know : Why isn't it effective? How do I know it's true? Or all those things, you know? I ok, right. Yes, really, a lot more listening and digging into the why and how patients feel, also, in relation to the side effects of the um...and what they have as effects, also, in relation to the pain, depending on the treatment...¶P Yes right, I think with those two things, we have a good start” P42  “A nurse or something that we can call to ask questions to find out where this is all going ... we need to know and I think we are in a lot of pain ... But, we don't have anyone to whom we can ask questions. The doctor who operated on me is inaccessible and that's all there and nothing else happens. I made an appointment with my family doctor to talk to him and ask him questions and to get information, and finally, he said to me: “look, your problems following your accident, don't talk to me about it anymore, I want to take it out of the file, it is the competence of your surgeon, not me, I do not take care of that anymore. [...] So ’m left without resources and I feel somewhat abandoned, that's it.” P63  “On the other hand, when you leave… you are left to yourself and you left to yourself all alone. This is it, this is your medicine, your prescription, go home. It ends there [...] That's it and yes, maybe somebody could have helped me on that side. I think so, and I'm not the only one who thinks that it could help a lot of people to be better followed.” P44  “¶P To manage the pain, I had zero support. Absolutely nothing. I was talking to my doctor, and even to the emergency room doctor, and I was talking to my family doctor… it was: “we don't know”. They didn't answer me outright and I was left on my own. ¶I Okay. So it was really a lack of support from the medical team? ¶ P Absolutely, and for the pain… it's a total lack of support.” P63  “I would say that it would be to have a contact person.” P63  “¶P I couldn't communicate to say that I had side effects and can you give me something else? I was tolerant, you know, despite my pain. I didn't want to bother anyone, either, because the nurses were really busy. ¶I So you would say, that it would be good if side effects were more taken into consideration, under more favorable conditions … ¶P Yes indeed and more into consideration when we’re talking about such doses.¶I Ok that we pay much more attention to side effects and that the link between the nurse and the doctor is done more quickly to see what can be done about that? ¶P These are exactly the words, right.” P35  “Of course when I had a nurse at home to be able to ask questions, it was good.” P34  “¶P And at home, of course I would have liked to have a follow-up. ¶I A post-release follow-up? ¶P Yes they tell me what to do as we go in physio… and we come back, but afterwards what do we do? «P49  “If I had been told before: “for a month's time you should expect to suffer.” Just that, it would have ... because we don't know it and we are in pain. I have wondered hundreds of times ... is it normal that it hurts so much? Worse, there was no response from anyone. I simply wish someone had told me I was going to suffer but that it’s how it needs to be and it’s normal [...] Like now, after three months, I still have a lot of pain in my knees and I I'm not yet able to bend over and get up. And I still have the same question as when I had my accident and after the operation; is this normal? But no one answers me. I have no answer. Now, I say to myself: maybe what I have is absolutely not normal or maybe that it is correct… but I do not know it.” P63  “I tell myself when you go out, we give you prescriptions and they say: look at this, it's for your pain and if it has no interference, take two uh ... it's basic you know. And sometimes I wonder if they don't have the time, or if they don't take the time. But it's still pretty quick, I mean, the recommendations are pretty uh… how would I say that? They are minimal, you know, we give you prescriptions and they tell you to do that, and there you go. So I find it basic, let's admit. [...] They could still… you know, they know that you are going to get discharged on such and such a day or when they find out that you are going to get discharged they could come if sit down with the person to say: “we are going to take 15 minutes together and we are going to discuss it” ... but this is not what they do ... they come to see you: “ah, the doctor gave you your leave, good, ok, great. We will come back to see you later. You will stop at the nurses 'office and we will give you your papers.” And, there you go, it stops there. There are not many interventions on that side. I understand that nurses are in great demand, but, in any case, that's it. The health system is like that, eh… our health system is sick… and it's been years and we know it… and it has not improved this year, on the contrary, it has deteriorated even more.” P44  “When I talk about addiction, it seems that the doctors didn't care too much” P34  “Uh… well, actually, I find that they don't have us… they don't actually come with us in the process. They don't tell us like that: well, we're going… we're going to have to wean. They don't explain that to us. It's just, you know, you're going on the internet and that's where you're gonna figure it out. But, in my case, my doctor, you know, he didn't tell me: okay, we're going to wean slowly and we're going to go with the trajectory there. [...] That's it and they tell you in advance, you know, just so that people are aware of not taking it as if it were candy. To tell us to try to manage and to decrease the amount of opioids, you know, and I imagine that there are plenty of people who don't even think about it to say to themselves that I have to decrease ... and, me , I had like quit cold turkey. Worse, my sister took me to the pharmacy. The pharmacist said: “Well no, you never stop abruptly. You really have to go gradually. Otherwise it's hard on the body.” P53  “Then uh… no, I wasn't expecting anything. I tell myself that if there was something… I'm going to call the doctor and I'm going to refer to him, you know, I'm not waiting uh [...] No, I wasn't expecting anything.” P56  “I do not know. I was quite well informed… I thought about the side effects. The follow-up was adequate.” P41  “Not much… we deal with it… and it will pass one day. I really do not expect anything from a doctor who will give me something for a little pinch in one leg there.” P31  “It's okay if he wants to see me, I'm going to go, he's my doctor but for the rest… look, no, I'm fine like this. That's it.¶I Ok, you don't really have expectations about pain relief? ¶P No.” P62  “I do not have any. «P23  “I think it was well managed. I think they told me what I had to do… then uh… no, you know, I had no expectations on everything I had there.” P46  “No it was okay for the follow-up. It was perfect.” P50  “I can't dem… in my condition, I don't think I could have asked for more than I have… it's been very good. I'm followed by three very good medical specialists uh… what they did for me… all the pills they gave me… I don't only have pills for normal pain. I have neuropathic pains which are even stronger and they still managed to manage the whole thing well.” P55  “¶P I think they did quite a bit of what needed to be done. ¶I Ok. ¶P When, uh… if it doesn't work out, well, I'm going to call my family doctor and I’ll see with her. Because she will be able to consult the specialists, if necessary. But, currently, I haven’t needed it.” P70  “Were your expectations met in terms of support and monitoring of pain and side effects of the medication? ¶P Yes. Well yes except ... yes, I will say yes.” P67  “¶P I think I am listened to well enough. ¶I Alright.¶P That's it, we consider what I'm advocating for myself. I have a very good follow-up.” P61 |
| **OPIOIDS**  *«Describe your experience of the most bothersome/constraining side effects you experienced when taking analgesics. «*  *«For the patient taking opioids: Would you like to change your pain management? «*  *«What actions have you taken or strategies have you used to minimize these side effects? «*  *«What strategies do you think would improve the management of adverse drug reactions? «* | **Adverse effects**   - None - Physical symptoms - Dry mouth - Exciting - Dizziness - Bad taste - Fatigue, drowsiness - Constipation - Insomnia - Nausea - Weightloss - Sweating - Tremors - Dizziness - Cognitive and behavioral disorders - Decreased libido - Hallucinations - Nightmares - Confusion - Memory loss - Weaning   **Adverse effects management**  No action taken  Do not know  Modification of the treatment  Additional medication  Change of therapy  Dose reduction  Treatment interruption  Changes in lifestyle (drink more, diet change)  **Desire to modify treatment**  Pursuit  Reduction  Interruption | “Uh ... I haven't had any nasty things (adverse effects) as such. [...] But I took them especially at night when I was in too much pain, and I fell asleep… so it wasn't unpleasant.” P52  “I didn't feel it… no.” P30  “No. I don't think it had any bad effects, anyway.” P62  “¶I You told me you had no side effects. But when you were in the hospital, you didn't have any either? ¶P No. ¶I Okay. So, you had no side effects whatsoever at the hospitalization or after? ¶ P No.” P48  “Ah, ok, the effects… I didn't have any side effects.” P64  “I don't really have any.” P24  “There wasn’t any.” P55  “I didn't have any.” P23  “Dry mouth” P35  “Dry mouth” P51  “Earlier you metnioned the dry mouth, and that I remember that I had the pasty mouth, it was disgusting, it was as if my cheeks were welded to my tongue and it was really disgusting” P67  “Another thing that I also noticed with regard to the medication, it’s the dryness, you know, the need to drink a lot. […] The very dry mouth and especially at night” P58  “When you take doses too close together ... it feels like being on Red Bull... I don't know if I can say that ... but if you take too much Red Bull, you get on edge[…]. I was shaking. I was hyper alert, if we can say it like that.”  P35  “It was more feelings of dizziness and nausea” P51  “I would say dizziness and nausea.” P14  “Well uh… actually, it rarely happened, it happened twice, I think, like dizziness. When I speak of dizziness, it was severe. It was really turning a lot yeah. It had happened to me twice and these were the most disturbing side effects.” P41  “Yeah, I got dizzy.”P65  “The bitter taste” P35  “It put me to sleep a lot.” P49  “The worst was drowsiness” P63  “I had all the effects you can imagine: dizziness, drowsiness and it was terrible, I found it difficult to stay awake for two hours during the day” P63  “What bothered me was it made me uh… like anti-social and the only thing I wanted to do was sleep” P22  “Uh… I would say drowsiness… Of course I don't know what drugs I was being given. This is drowsiness and it was a side effect. I felt a lot more tired, that's for sure.” P58  “When I took my Dilaudids… of course I was asleep all the time” P65  “It put me to sleep” P61  “Zero energy” P51  “During the hospitalization it was constipation.” P50  “I also had medication which gave me a little constipation” P58  “It was more the constipation that bothered me.” P46  “It was constipation […] It was momentary…” P43  “Then a lot of constipation” P63  “¶P After I was released from the hospital, I didn't have any side effects. ¶I Ok apart from constipation? ¶P That's it, yes.” P70  “The first was constipation.” P49  “Uh… when I took too much… when I took more than the recommended dosage… then I had insomnia… it's weird.” P43  “Uh… nausea and, that was in the hospital, with the Dilaudid” P53  “I would say dizziness and nausea.” P14  “Nausea” P51  “I don't know and I can't really say uh… the time that I was in the hospital, I… look, personally, I lost 15 pounds in the week when I was there .” P62  “I had sweats” P53  “Tremors” P53  “Dizziness” P63  “I have a bad libido…” P31  “It's worse uh ... hallucinations” P31  “Because of the nightmares” P08  “In the beginning, […] and a bit of confusion” P42  “The second was not being in my right mind. […] Uh… a lack of judgment or how to say that I wasn't making decisions. I was passive. I was like a little kid and (laughing) anyone could do whatever they wanted with me, I had no spine.” P49  “It's confusion, I would say. […] But the worst was not being in my right mind.” P34  “That's it, but, it's that I'm losing… you know, I was reading, and at one point, the letters got tangled up, you know, and no, no, I didn't like that at all.” P61  “In the beginning, I had memory loss”P42  “And I didn’t even talk about the weaning… that was not a walk in the park” P63  “Withdrawal, I can tell you that I can classify that as one of the worst moment of my life.”P63  “Tremors” P53  “I had sweats” P53  “ I didn't do anything to improve that.” P41  “Um… I don't really know.” P22  “What am I doing? I’m smoking (talking about cannabis)” P22  “I had to take a powdered supplement [...] for my bowel movements, to make it easier.” P58  “At the hospital, they gave me suppositories.”P50  “At the hospital I was okay because I was almost forced to take a laxative.” P46  “I called my pharmacist, and she prescribed me things like Colax, and Emolax. In any case, it's a good combination which I vary, I mean, I take it every day” P70  “¶I What are the strategies also that would make it possible, in your opinion, to improve the management of the adverse effects of the medication? For example, like changing the treatment, or reducing the amount? ¶P Yes correct or try treatments that may be less effective but have fewer side effects?” P34  “I told him the next day, I think… I don't know… I don't remember anymore, everything is a little blurry. But I remember very well saying that “I want morphine… I don't want the other”, because someone told me it was a synthetic thing and I didn't want. […] But I wanted to try morphine because with the other I was not doing well” P53  “They took away the morphine and gave me this one instead (talking about oxycodone).” P56  “Oh no, no, it was really the minimum dose I was taking and the nurse respected me in that.” P44  “I reduced consumption.” P34  “Yeah I just took it as needed” P43  “Uh ... I would say not to exaggerate too much ... and just take some if necessary” P14  “I reduced my doses… I reduced my doses and, the less I took, the better I felt.” P35  “I stopped these drugs there.” P31  “I stopped it as quickly as possible.” P51  “I just quit at some point.” P61  “There, what I did is that I stopped er… I did not renew the prescription” P49  “I stopped taking them.” P42  “Well, he (the doctor) started by stopping them, there’s that.” P08  “To eat well.” P14  “What my girlfriend told me is that in the early days, I spent my time saying “I want water ... I want ice ... I want water ... I want ice.” I drank uh ... water bottles from Costco, I drank and uh ... that helped me.” P67  «My diet with more fiber and less protein.” P46  “¶I So if you had still had opioids, would you have continued treatment with them or not? ¶P Yes. ” P24  “¶I Did you want to change your pain treatment when you were taking opioids to move on? ¶P No.” P24  “¶I If you had had to take more opioids, would you have wanted to change your pain treatment? ¶P Um… .no.” P31  “But no, I didn't want to change.” P23  “¶I When you were taking opioids, did you want to change your pain treatment or not? ¶P No. No. No.” P14  “¶I Before, when you were taking opioids in the hospital, did you want to change your treatment or not? ¶P No. If I had had side effects, long term, maybe then. But no.” P41  “¶I Since you've been on opioids, would you have liked to change your pain medication or was that okay with you? ¶P No, that was okay with me.” P50  “¶I Would you like to change your pain treatment with opioids or not? ¶P No.” P55  “¶I Regarding opioids: would you have liked to change your pain treatment with opioids or not? ¶P Me, I… no, no” P70  « No. Not for the moment there, you know, I mean to reduce my doses according to… I go there as needed. I don't need to go explore anything else… I know it's effective that way.” P46  “Because I don't like taking opioids. I dread using that. But, at the moment, that's what I'm told to take. So, this is what I do.” P63  “Yeah but… that's why during the day I tried not to… not to take them” P52  “I don't like taking pills” P22  “¶I Precisely for you who was taking opioids, you wanted to change the treatment for pain?» P That's it” P08  “¶I When you were taking opioids, before, what you had uh… you wanted to stop the treatment precisely because you were afraid that it was like an addiction? ¶P Yes. Yeah.” P53  “I stopped taking it because, you know, I was prescribed like say 30 pills, but, I took one and the rest went into the garbage.” P62 |
| **CANNABIS**  *Do you use cannabis?*  *If yes,*  *- For what purpose?*  *- What are the main advantages and disadvantages?*  *- Which form(s) do you use it?*  *- Which brand(s) do you prefer?*  *If not,*  *- Why don't you use it?*  *- Would you be interested in using it for medical purposes?*  *- Which form would you be most likely to consume it?* | **Reasons for use & adverse effects**  Purpose  Analgesic use  Recreational use  Both use  Self-medication  Benefits  AEs management  Contributes to well-being (help moral, sleep, relaxing, laughing, reducing inhibition, stress reduction, mood amplification)  Pain relief  Help to focus  Disadvantages  None  Difficulties in supplying (high price, stressful SQDC)  AEs (bad functioning, memory loss, dry mouth, difficulty in speaking, drowsiness, addiction problem)  Difficulty to use (difficult to dose, don’t want to mix with medication, cannabis prohibited at work, not able to drive)  Favorite brands  Indifferent  Have no idea  Choice  Used forms  Oil  Food  Smoke  **Reasons for non-use & openness for medical usage**  Reason for non-use  Absence of interest  Perceived as a drug  Mistrust  Impacts on health (avoid combustion byproducts, considered as psychotropic)  Little knowledge on the subject  Medical use  Interested  Uninterested  Preferential forms  Oral sprays  Oil  Food  Pills | “Uh… pain reliever.” P43  “Right now it's really pain relieving.” P30  “¶I So, you told me that you use cannabis for analgesic purposes mainly to treat your pain?¶P Yeah.” P22  “It's for fun and for relaxation.” P62  “Ah yes, yes. Absolutely for recreational purposes, once in a while, yes.” P34  “Yes that's the word I was looking for.” P35  “It's more recreational now.” P43  “¶I I would like to know what are the reasons for which you consume cannabis for recreational purposes? ¶P For recreational purposes once every two months.” P63  “¶I Is it mostly recreational? ¶P Yes” P31  “¶I So you told me you smoke cannabis. Is it mostly for the pain or is it recreational, or both? ¶P Well… both.” P23  “Both” P61  “Both. [...] To have fun with my friends and to remove the pain.” P24  “It was more medication, like ADHD […] it was basically my way of self-medicating.” P14  “It's that the side effects are very manageable.” P34  “You have no effects ... bad effects ... like the pills can do” P22  “I don't feel any side effects (with CBD)” P43  “It helped me in the beginning to be quiet (he laughs) to do nothing.” P43  “It (the main advantage) was that I was able to sleep easily at night.” P14  “It especially helped me to go to bed and to sleep well” P43  “I was not in demand all the time. I was quiet” P14  “Yes definitely a relaxation. I am able to take stock.” P61  “It's definitely a good relaxant. It takes your mind off things.” P30  “You relax.” P31  “Nothing except laughter” P63  “In terms of communication, too, it breaks inhibitions, and I am able to express myself with less fear.” P61  “Well that takes the pressure off me a bit, the stress.” P23  “It amplifies my happiness (she laughs) and I will laugh a lot… I'm very sneering. But when I smoke, I am even more sneer. It makes the music better and everything is better when I smoke.” P44  “I wasn't in pain» P14  “It numbs the pain a little bit. «P30  “It helps me to think a bit more clearly too.” P23  “It helps me… you know, at some point you need to take stock and you need introspection… well that helps a lot.” P61  “I was quiet and I was focused.” P14  “No.” P63  “CBD? I don't see any drawbacks. […] Cannabis? It also depends there, in regards to me, there are no disadvantages as such.” P61  “Disadvantage? Well… there isn't. «P24  “The inconvenients? I do not see any «P30  “I have no inconveniences» P23  “I found it quite expensive at the SQDC… so I bought it uh… how do I say that? Not in the street, but, you know, let's say ” P43  “It was expensive” P62  “I found it stressful to go in there (he laughs).” P62  “I was no longer able to function when I was using this” P43  “Well, memory loss, yeah, bad short-term memory.” P43  “¶I Drowsiness also dry mouth or not? ¶P Yeah.” P43  “To have a dry mouth and uh… to have a soft mouth, no.” P31  “Uh ... difficulty speaking (chuckles), let's say, kinda like that” P43  “I'm often tired.” P23  “I have a history of drug addiction. So I haven't touched that anymore, at all, for several years” P42  “It's that the dosage can be difficult because if you take too much, it's uncomfortable.” P34  “I thought that cannabis might help me because it helps sleep it might help me in pain too. Except that since I was taking morphine, I absolutely wanted to avoid mixing with anything else because I didn’t know what the result could be” P63  “In my job, it’s absolutely zero tolerance.” P49  “Uh… not being able to drive.” P31  “The only downside is you can't drive while impaired” P35  “Yes, but, you know, it's not… I don't have a strong preference there.” P34  “Not at all.” P23  “No.” P62  “No.” P24  “Not at all.” P30  “No.” P31  “Well… I don't know them well enough there yet… but, while shopping, it seemed that I had bought the Solei brand every time… it was aa coincidence.” P43  “That's a good question. But the brand… I have no idea. But I know we took it from the SQDC and they sold us some that tasted less bad. But I have no idea of ​​the brand.” P63  “I order my oil from British Columbia” P61  “Tangerine Dream by San Rafael Brand” P44  “It's Indica.” P22  “The Hybrid is the mixture of the two, it's a liquid, let's say, it's in between.” P35  “There's oil, jujubes, or er...you know, there are different biscuits, whatever, and I don't have any trouble with that.” P67  “CBD? I take it in oil.” P61  “Yes I eat it.” P43  “I don't even smoke joints because right now, I am not able to roll, I have only one hand. So I smoke that in a pipe and uh… it's just one 'puff'.” P62  “In joints.” P31  “I smoke it with a cigarette roller.” P35  “I just smoke it.” P24  “¶I From what I understand is that you currently smoke it, right? ¶ P THC? Yes.” P61  “In a cigarette. […] Yeah I smoke it.” P63  “¶I In what forms do you use cannabis the most? ¶P Uh… the… the flower, you know, like… ¶I Do you mostly smoke it? ¶P Yeah that's it.” P22  “I smoke it because there is no other way… for now, you know, because they haven't been releasing other cannabis products that can have effects for very long. still similar when you smoke it.” P44  “¶I When you consume is to smoke it mainly? ¶P Yes.” P23  “In joints.” P30  “I just have no interest and it's… I'm not making a conscientious case there. It just doesn't interest me.” P64  “I never took it. That does not interest me there.” P65  “Uh ... I don't see the point. But, you know, I have nothing against that. But I didn't see the point of going towards that” P52  “I have never used cannabis and I am not interested.” P50  “Not at all.” P70  “Personally I was never in favor of people taking drugs.” P48  “I’m not attracted to drinking and I’m not attracted to drugs. These are things that scare me.” P56  “I was never really a fan because of what it did to the people around me… so…”P08  “For me, I don't see it as a cure. But, I see it more as a drug. It makes me stay away from it. I still had a heavy experience of drug use. So I reject it out of hand.” P46  “I would say that I have no reason as such, but, I just don't trust that. It’s a question of trust.” P58  “Well, I don't like smoking it because there are some combustion byproducts that I'm going to try to avoid.” P34  “it's still psychotropic drugs.” P51  “I never bought cannabis and specialty stuff and that sort of things. Personally, what I took ... I have maybe taken around ten times in my life. The times that I took it uh… Hey! that was powerful. The effect for me… I know my brother told me that now what is sold is controlled and much less strong. For now, since the accident, even if I would like to take it, it would take permission from the doctor and it might be complicated and I do not know the doctors' opinions on this subject.” P55  “Uh ... with studies, yes. […] For the pain and that it does not affect my brain either and that I am not high as a kite like the young people say.” P49  “Well, yes if it works, because I'm prepared to take anything if a specialist tells me that it works. […] I want to have someone who is specialized in his field and who says to me: “if you take this, that, that to such degree that and that ...” look, I'm going to get on board, that's for sure. Yes, for sure I’m in. […] But you understand if it works and it controls the pain well that it's not chemicals and whatever and I don't mind as long as it's well prescribed and well followed.” P55  “Yes, I would be interested in taking some.” P41  “Well, if it’s to relieve things… yes, but not for my headache.” P65  “Yeah if nothing else would work there, you know, because taking opioids isn't something I like. So I tell myself that if I was with pain for life than maybe a little bit of that, it might be better… but I would have to have more information.” P56  “If it is in jujubes, or in a product that is not inhalable, I would say yes.” P67  “Well, if it's been proven and monitored by a post-traumatic pain specialist uh… yes. But yes! Yeah.” P51  “¶ A Would you actually be interested in its medical use but with CBD? ¶ P Yes. Yes because it is still a natural thing that I consider and why not?” P53  “Because I could get it unlike opiates.” P43  “¶A Okay and even in medical use, you wouldn't be interested either? ¶ P No. It wouldn't interest me either.” P50  “¶A If so, would you be interested in using it for medical purposes or not at all? ¶ P Oh no! Oh no, no, no!” P70  “It might be a spray if I can't eat it” P56  “Yes in oil or in spray, I think” P53  “In food or with a vaporizer.” P34  “¶P Other shapes uh ... it's okay there, one or the other, yeah. ¶I Okay. So that would be in the form of oils or in food, right? ¶P Exactly, yeah.” P51  “Ah yes uh… is there also like eating it, say, like brownies? ¶I Yes, you can too.¶P Yeah, I think that would be it.” P08  “In the diet” P34  “Ah maybe it would be to eat it. […] Yes maybe like a pill or something that I eat or… but I don't know because I don’t know much about this” P56  “¶P Me, as long as I have it like pills, you know, children don't necessarily see it, […] when you have a wife who is a bit against it, we have to avoid people home. ¶I Yes I totally understand.¶P So that I ... basically, if nobody looks at the kinds of pills that I take, I mean that if I have them in capsules or in pills, in my pod, nobody is going to meddle with this.” P55  “Yes maybe like a pill or something that I eat or… but I don't know because I don't know much about this.” P56  “In pills. [...] I wouldn't want to smell it or taste it but take it like the medicine I'm taking now.” P49 |

¶P : Participant

¶A : Interviewer
